# Supplementary material
Source: PubMed Central journal article supplement (PMC5804985)

**A**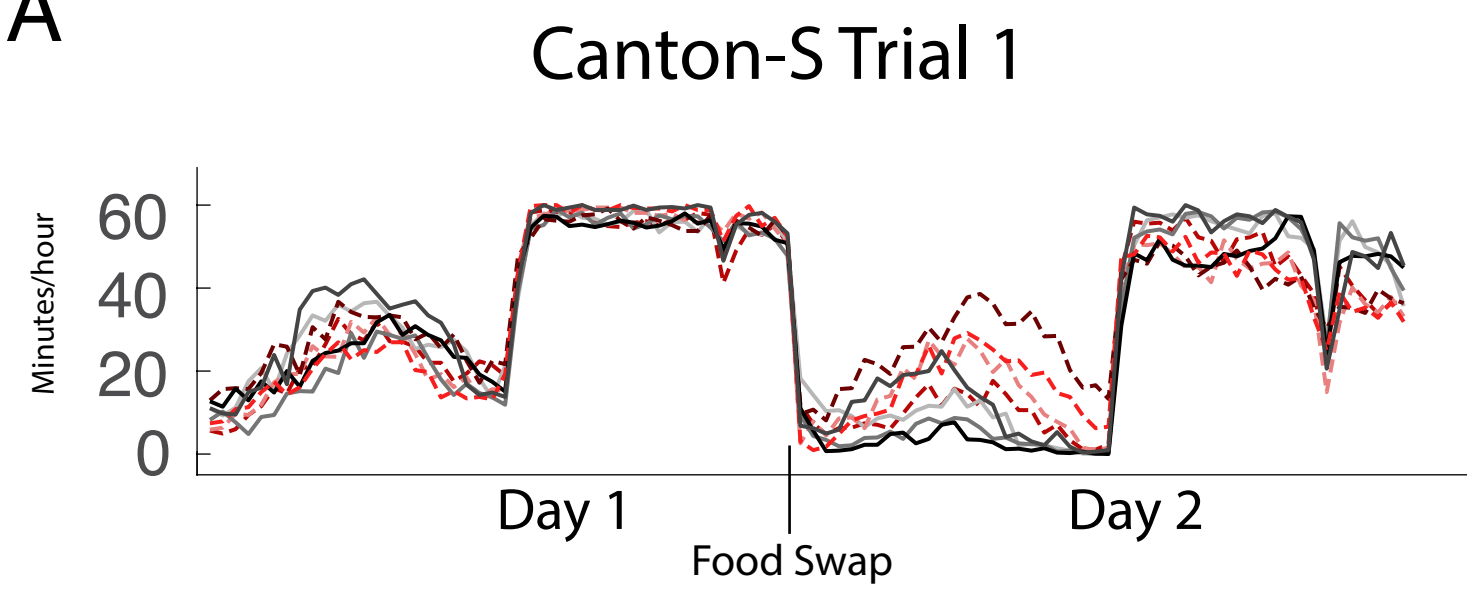Caffeine Sucrose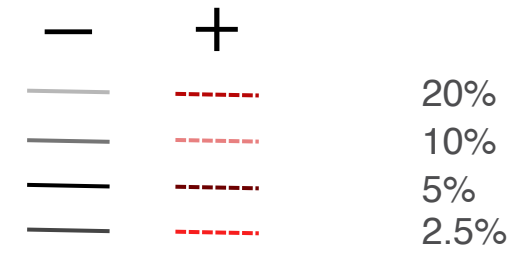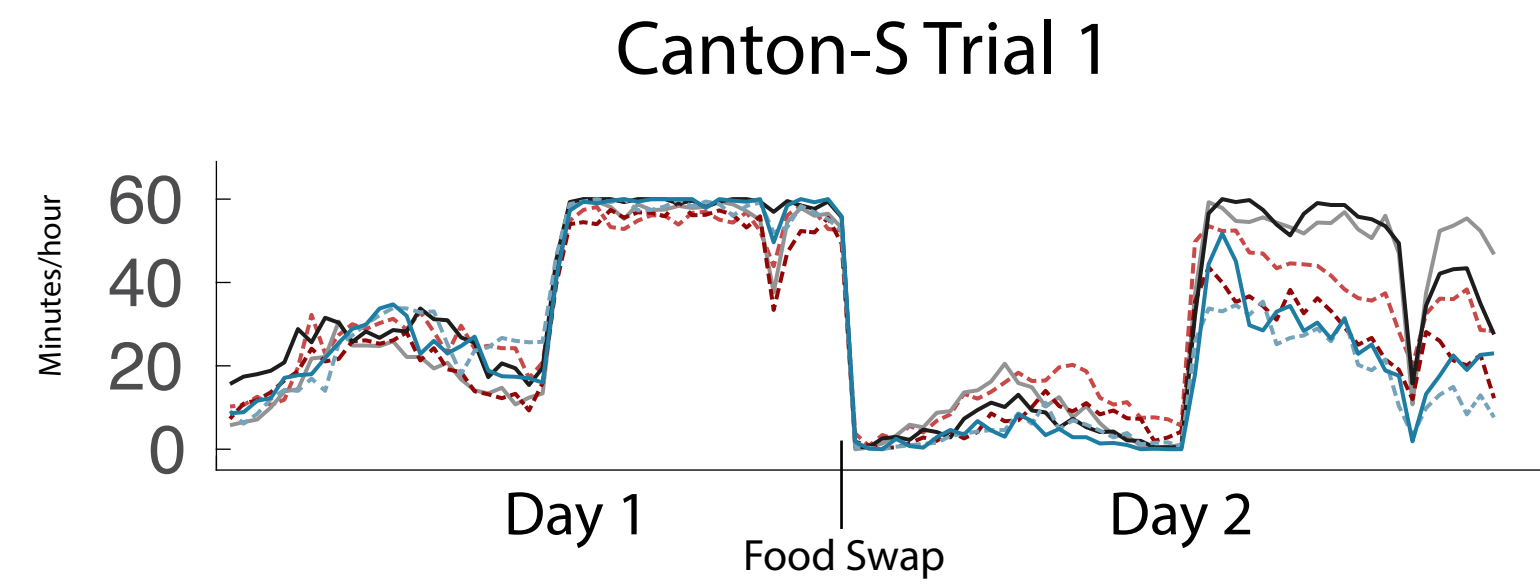Caffeine Sucrose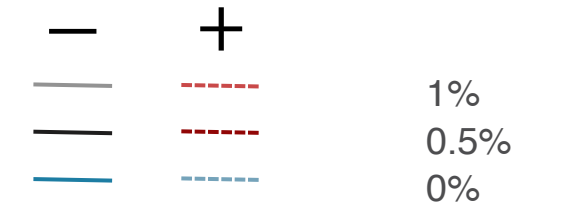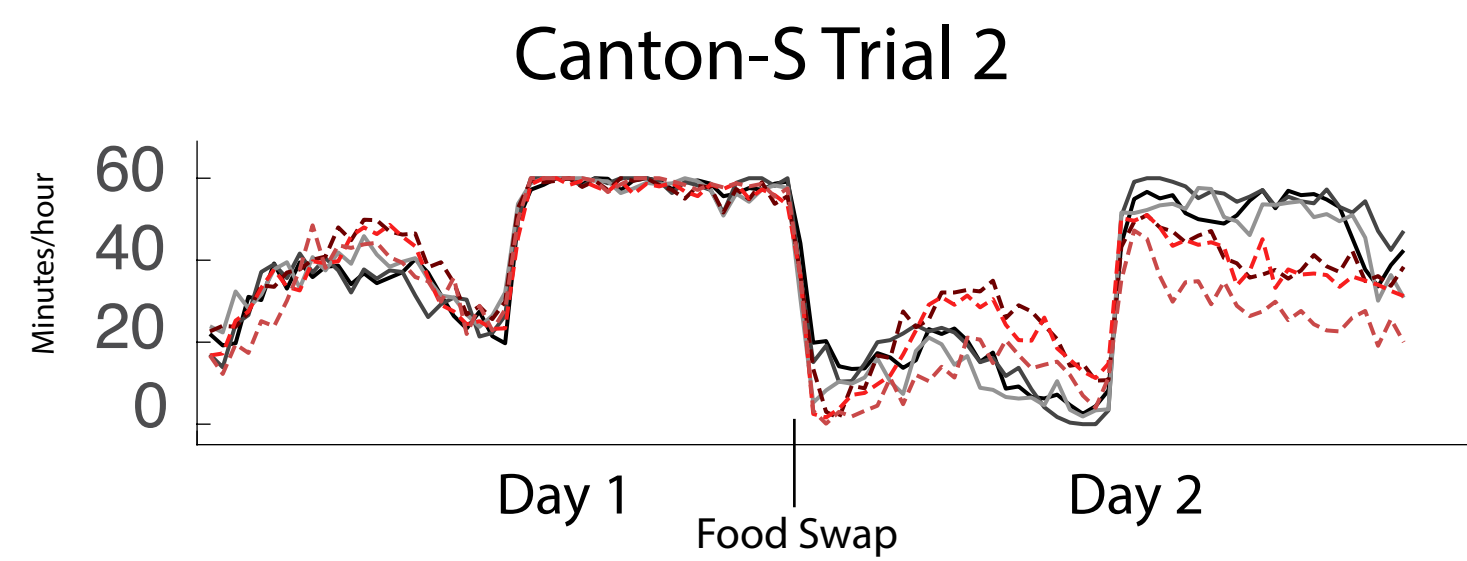Caffeine Sucrose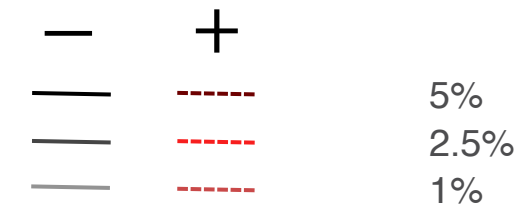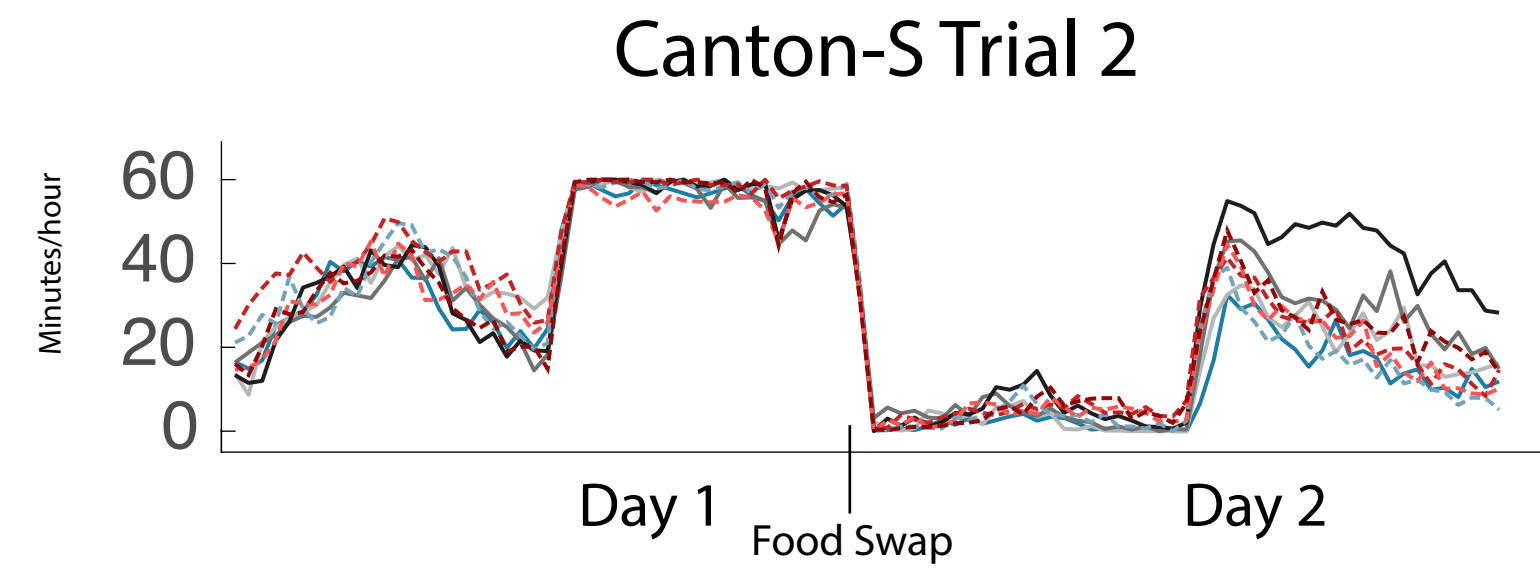Caffeine Sucrose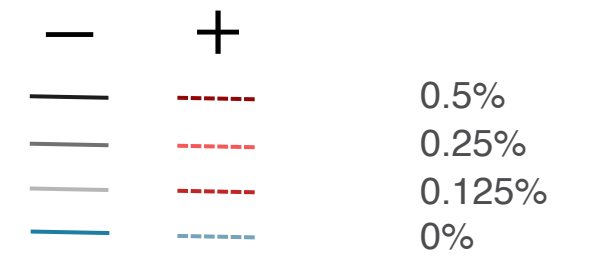**B**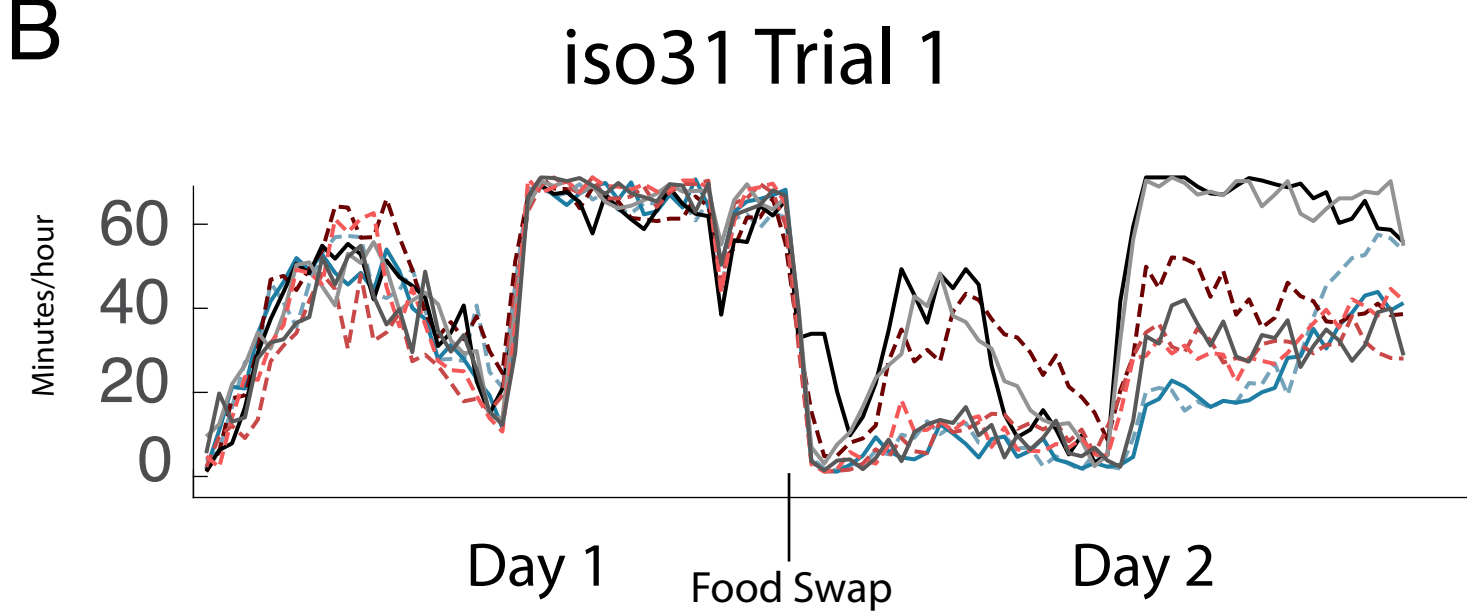Caffeine Sucrose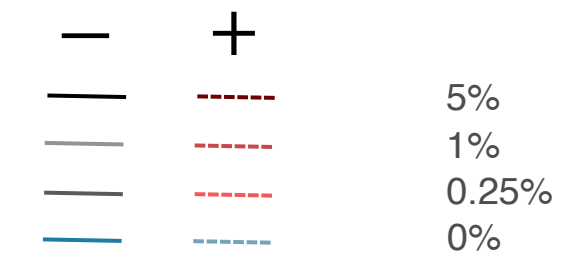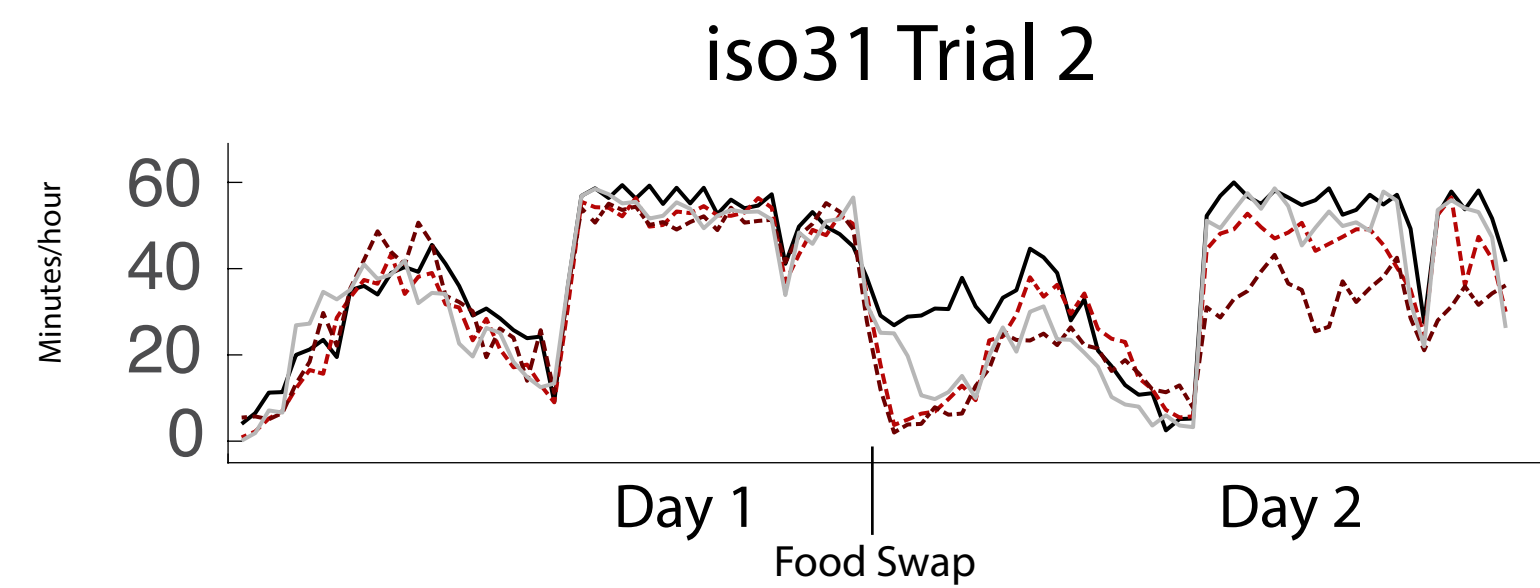Caffeine Sucrose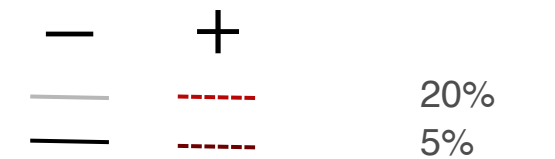**C**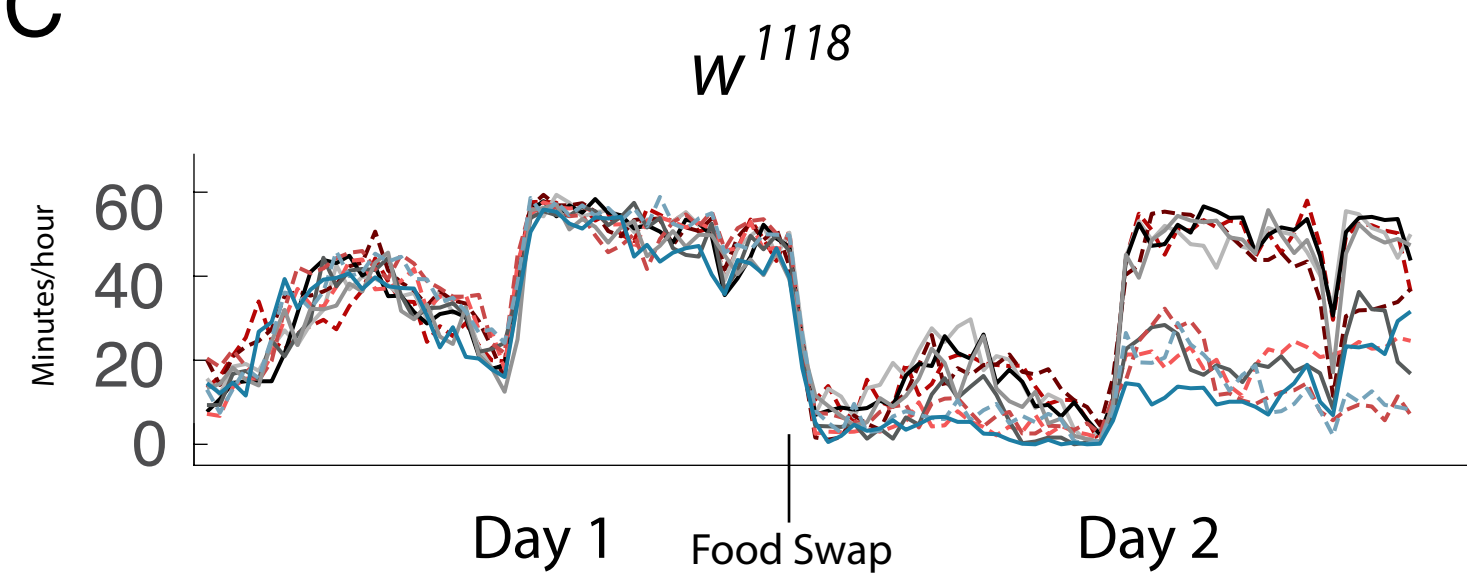Caffeine Sucrose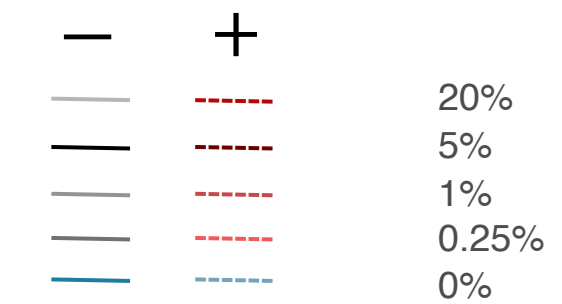

Supplement: zsx146_suppl_figure_s1.pdf [file zsx146_suppl_figure_s1.pdf]
