# Supplementary material
Source: PubMed Central journal article supplement (PMC5804985)

### Nighttime sleep (12-hour dark period, ZT 12-24)

A

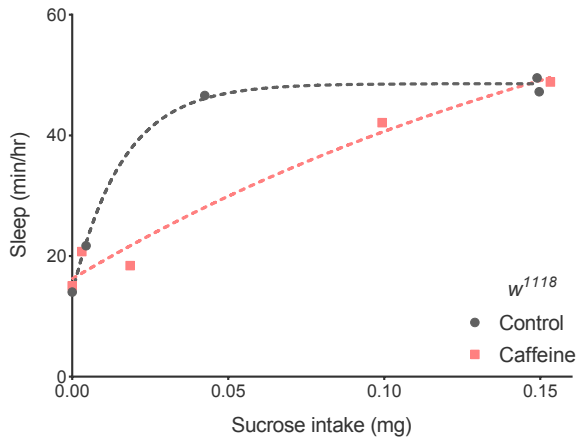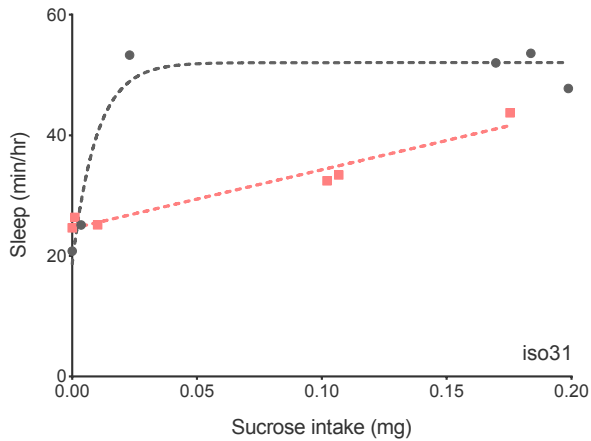

### Total sleep (ZT 0-24)

B

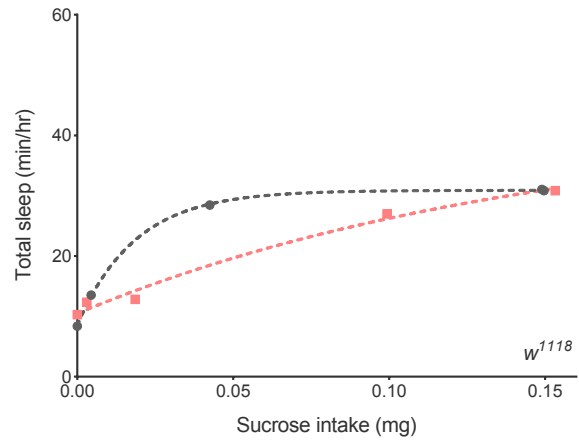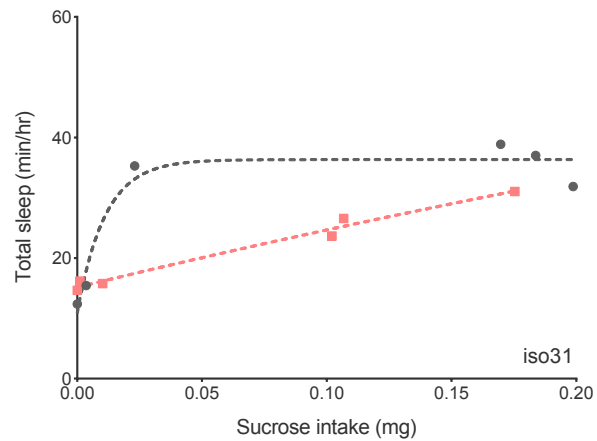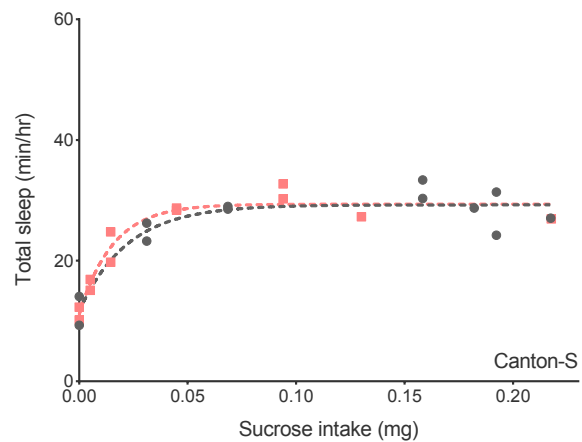

Supplement: zsx146_suppl_figure_s4.pdf [file zsx146_suppl_figure_s4.pdf]

## Daytime sleep (12-hour light period, ZT 0-12)

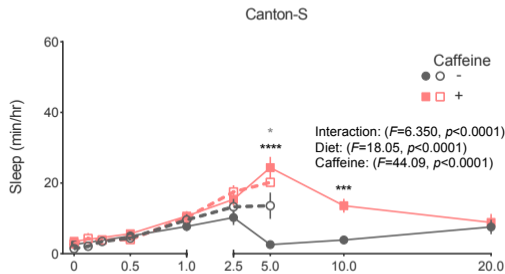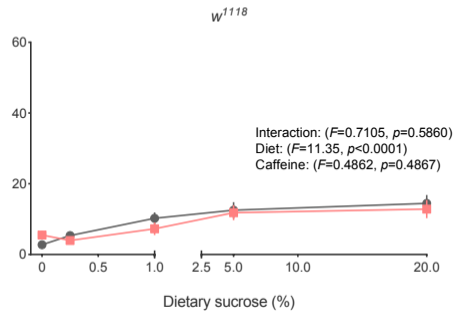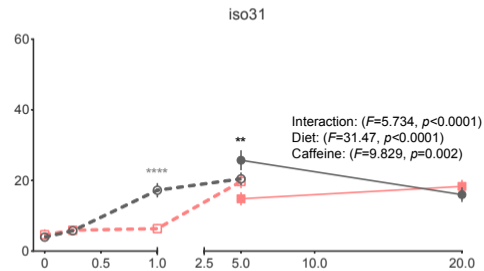

Supplement: zsx146_suppl_figure_s5.pdf [file zsx146_suppl_figure_s5.pdf]
